# Supplementary material for: Mn2+cation-directed ionothermal synthesis of an open-framework fluorinated aluminium phosphite–phosphate
Source: Royal Society of Chemistry journal article supplement (doi:10.1039/c4ra05350h), 2014-06-24
Supplement: c4ra05350h1.pdf [file c4ra05350h1.pdf]

## Electronic Supplementary Information

# Mn<sup>2+</sup> Cation-Directed Ionothermal Synthesis of an Open-Framework Fluorinated Aluminium Phosphite- Phosphate

Hao Liu,<sup>a,b</sup> Zhi-Jian Tian,<sup>\*a,c</sup> Hermann Gies,<sup>d</sup> Ying Wei,<sup>d</sup> Bernd Marler,<sup>d</sup> Lei Wang,<sup>a</sup>  
Ya-Song Wang,<sup>a,b</sup> and Da-Wei Li<sup>a,b</sup>

<sup>a</sup> Dalian National Laboratory for Clean Energy, Dalian Institute of Chemical Physics, Chinese Academy of Sciences, Dalian, China. Fax: (+86) 411-843-79151; E-mail: [tianz@dicp.ac.cn](mailto:tianz@dicp.ac.cn)

<sup>b</sup> University of Chinese Academy of Sciences, Beijing, China

<sup>c</sup> State Key Laboratory of Catalysis, Dalian Institute of Chemical Physics, Chinese Academy of Sciences, Dalian, China

<sup>d</sup> Institute for Geology, Mineralogy and Geophysics, Ruhr-University-Bochum, Bochum, Germany

### **S1. Synthesis of single crystals of DNL-2**

A beaker was consecutively charged with [EMIm]Br (100 mmol),  $\text{H}_3\text{PO}_3$  (10 mmol, 50 wt% in  $\text{H}_2\text{O}$ ),  $\text{Al}(\text{OH})_3$  (2.5 mmol),  $\text{MnO}_2$  (2.5 mmol), HF (3 mmol, 40 wt% in  $\text{H}_2\text{O}$ ). After stirred at 90 °C for 1 h, the reaction mixture was transferred into a PTFE-lined stainless autoclave (capacity: 30 mL) to crystallize at 160 °C for 21 d. After cooling to room temperature, the product was washed with deionized water, filtered and then dried at 120 °C overnight. A mixture of colourless hexagonal prismatic crystals and white powder was obtained (Fig. S1). Powder X-ray diffraction pattern of DNL-2 (Fig. S2) matched the simulated pattern based on structural analysis well except a slight diffraction peak of  $\text{Al}(\text{OH})_3$ . Energy dispersive X-ray spectroscopy indicated the F/Al/P/Mn molar ratio of 13.9/12.0/18.0/3.40.

## S2. Structure determination of DNL-2

A colourless hexagonal crystal with dimensions of 0.1677 mm × 0.1281 mm × 0.0985 mm was carefully selected for the X-ray diffraction experiment. The intensity data was collected on a four-circle kappa diffractometer (Xcalibur, Oxford Diffraction) equipped with a CCD detector and an enhanced X-ray source (graphite monochromatized Mo  $K\alpha$  radiation,  $\lambda = 0.71073$  Å) at room-temperature.

The structure was solved with direct method and refined on  $|F|^2$  by full-matrix least squares using SHELXL97.<sup>S1</sup> DNL-2 has a hexagonal space-group  $P6_3/m$  (No. 176). Crystallographically independent atoms Al1, P1 and P2 exist in each asymmetric unit, and the corresponding primary building units are  $\text{AlO}_{4b}\text{F}_{2b}$ ,  $\text{H-PO}_{2b}\text{O}_t/\text{HO-PO}_{2b}\text{O}_t$  and  $\text{H-PO}_{3b}/\text{HO-PO}_{3b}$  respectively (Fig. S3). Both of the P1 and P2 sites were found to split into two positions P11/P12 and P21/P22. Each P site connected with three O atoms. The sum of P–O bond-valences for each  $\text{P}^{\text{III}}$  is 3.90–4.16. This indicates that the P-centered polyhedra could be assigned as  $\text{H-PO}_3$  groups.<sup>S2</sup> Fourier transform infrared spectrum (FT-IR) also shows the characteristic band at  $2430\text{ cm}^{-1}$  corresponding to the stretching vibration of framework P–H bond (Fig. S4).<sup>S3</sup> However, the fourth connected O atoms (O6 and O7 respectively) were found near P11 and P22. Considering the P–O distances (P11–O6:  $1.532(9)$  Å, P22–O7:  $1.540(10)$  Å), O6 and O7 were assigned as O atoms of terminal P–OH groups.<sup>S4</sup> Therefore, P11 and P22 are occupied by  $\text{P}^{\text{III}}$  as well as  $\text{P}^{\text{V}}$ . The ratios of  $\text{P}^{\text{III}}/\text{P}^{\text{V}}$  were determined by the occupancies of O6 and O7 ( $0.227(15)$  and  $0.138(12)$  respectively).

Because the extra-framework organics are highly disordered, their structures can not be solved from single crystal X-ray diffraction data. The electron distribution calculated from the difference Fourier map indicates that the organics dynamically locate on the mirror planes perpendicular to the  $c$ -axis. In each  $[6^212^3]$  cage, the total electron number of the extra-framework organics approximately equals to 61.9. This result fits well with the 61 electrons

---

S1 G. M. Sheldrick, *Acta Crystallogr. Sect. A*, 2008, **64**, 112.

S2 a) J. Loub, *Acta Crystallogr. Sect. B*, 1991, **47**, 468; b) S. Fernández-Armas, J. L. Mesa, J. L. Pizarro, J. S. Garitaonandia, M. I. Arriortua and T. Rojo, *Angew. Chem. Int. Ed.*, 2004, **43**, 977.

S3 Y. Ma, N. Li, S. Xiang and N. Guan, *J. Phys. Chem. C*, 2007, **111**, 18361.

S4 J. Yu, K. Sugiyama, S. Zheng, S. Qiu, J. Chen, R. Xu, Y. Sakamoto, O. Terasaki, K. Hiraga, M. Light, M. B. Hursthouse and J. M. Thomas, *Chem. Mater.*, 1998, **10**, 1208.

of one [EMIm]<sup>+</sup> cation. The typical vibration bands in the FT-IR of DNL-2 also proved the existence of [EMIm]<sup>+</sup> cations (Fig. S4 and Table S1).<sup>S5</sup> Based on above results, we deduce that each cell unit contains two [EMIm]<sup>+</sup> cations to balance the framework charge.

In each unit cell, 3.4 Mn<sup>2+</sup> and 2 [EMIm]<sup>+</sup> cations exist in the structure. As a result, 3.2 H atoms were added to the formula to balance the valance of the anionic framework (−12). These H atoms may connect with the dangling P–O<sub>t</sub> bonds of H–PO<sub>2b</sub>O<sub>t</sub>/HO–PO<sub>2b</sub>O<sub>t</sub> or fill in the channels as H<sub>3</sub>O<sup>+</sup> cations.

---

S5 a) A. Elaiwi, P. B. Hitchcock, K. R. Seddon, N. Srinivasan, Y.-M. Tan, T. Welton and J. A. Zora, *J. Chem. Soc., Dalton Trans.*, 1995, 3467; b) S. A. Katsyuba, E. E. Zvereva, A. Vidiš and P. J. Dyson, *J. Phys. Chem. A*, 2007, **111**, 352; c) R. Pei, Y. Xu, Y. Wei, G. Wen, K. Li, L. Wang, H. Ma, Z. Tian and L. Lin, *Chin. J. Catal.*, 2010, **31**, 1083.

**Table S1** The assignment of typical vibration bands of EMIm cations in the Fourier transform infrared spectrum of DNL-2.

| Wave Number / $\text{cm}^{-1}$ | Assignment                   |
|--------------------------------|------------------------------|
| 3159, 3120                     | the ring C–H stretch         |
| 3000~2860                      | the alkyl C–H stretch        |
| 1639, 1576                     | the C=C stretch              |
| 1472                           | the asymmetric N–C–N stretch |
| 1460~1380                      | the alkyl bend               |

**Table S2** Gel compositions, crystallization conditions and the crystal phases of the products.

| Entry | Gel composition <sup>a</sup>                                                                                                                                        | T / °C | t / d | Product <sup>b</sup>        |
|-------|---------------------------------------------------------------------------------------------------------------------------------------------------------------------|--------|-------|-----------------------------|
| 1     | 2.5 Al(OH) <sub>3</sub> : 2.5 MnO <sub>2</sub> : 10 H <sub>3</sub> PO <sub>3</sub> : 3 HF : 60 H <sub>2</sub> O :<br>100 [BMIm]Br                                   | 160    | 7     | DNL-2 + Al(OH) <sub>3</sub> |
| 2     | 2.5 Al(OH) <sub>3</sub> : 2.5 MnO <sub>2</sub> : 10 H <sub>3</sub> PO <sub>3</sub> : 3 HF : 10 MIm :<br>60 H <sub>2</sub> O : 100 [EMIm]Br                          | 160    | 7     | DNL-2                       |
| 3     | 2.5 Al(OH) <sub>3</sub> : 2.5 MnO <sub>2</sub> : 10 H <sub>3</sub> PO <sub>3</sub> : 3 HF : 10 TEA :<br>60 H <sub>2</sub> O : 100 [EMIm]Br                          | 160    | 7     | DNL-2                       |
| 4     | 2.5 Al(OH) <sub>3</sub> : 2.5 MnO <sub>2</sub> : 10 H <sub>3</sub> PO <sub>3</sub> : 3 HF : 10 TEAC :<br>60 H <sub>2</sub> O : 100 [EMIm]Br                         | 160    | 7     | DNL-2                       |
| 5     | 2.5 Al(OH) <sub>3</sub> : 2.5 MnO <sub>2</sub> : 10 H <sub>3</sub> PO <sub>3</sub> : 9 HF : 60 H <sub>2</sub> O :<br>100 [EMIm]Br                                   | 160    | 7     | DNL-2 + Al(OH) <sub>3</sub> |
| 6     | 2.5 Al(OH) <sub>3</sub> : 2.5 MnO <sub>2</sub> : 8 H <sub>3</sub> PO <sub>3</sub> : 2 H <sub>3</sub> PO <sub>4</sub> : 9 HF : 60<br>H <sub>2</sub> O : 100 [EMIm]Br | 160    | 3     | DNL-2 + Al(OH) <sub>3</sub> |
| 7     | 2.5 Al(OH) <sub>3</sub> : 2.5 MnO <sub>2</sub> : 6 H <sub>3</sub> PO <sub>3</sub> : 4 H <sub>3</sub> PO <sub>4</sub> : 9 HF : 60<br>H <sub>2</sub> O : 100 [EMIm]Br | 160    | 3     | (clear solution)            |
| 8     | 2.5 Al(OH) <sub>3</sub> : 2.5 MnO <sub>2</sub> : 4 H <sub>3</sub> PO <sub>3</sub> : 6 H <sub>3</sub> PO <sub>4</sub> : 9 HF : 60<br>H <sub>2</sub> O : 100 [EMIm]Br | 160    | 3     | CHA                         |

<sup>a</sup> [BMIm]Br, 1-butyl-3-methylimidazolium bromide; [EMIm]Br, 1-ethyl-3-methylimidazolium bromide; MIm, 2-methylimidazole; TEA, triethylamine; TEAC, triethylamine hydrochloride.

<sup>b</sup> The crystal phases of the products were determined by their X-ray powder diffraction patterns.

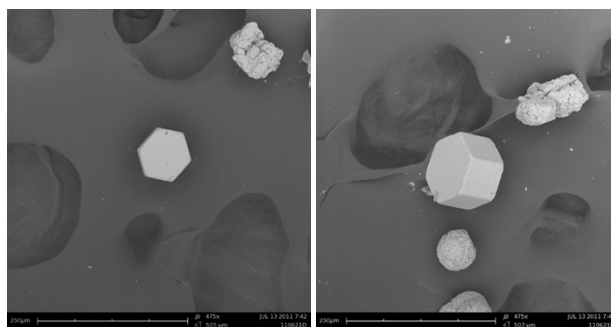

**Fig. S1** The scanning electron microscopy of DNL-2.

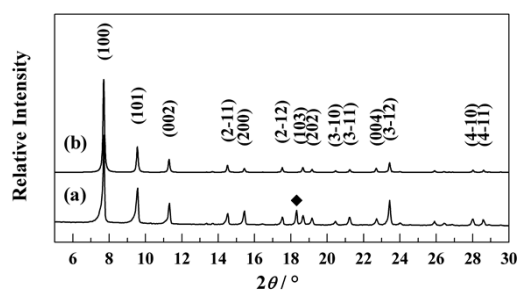

**Fig. S2** The experimental (a) and simulated (b) X-ray powder diffraction patterns of DNL-2. ◆

indicates the diffraction peak of  $\text{Al}(\text{OH})_3$ .

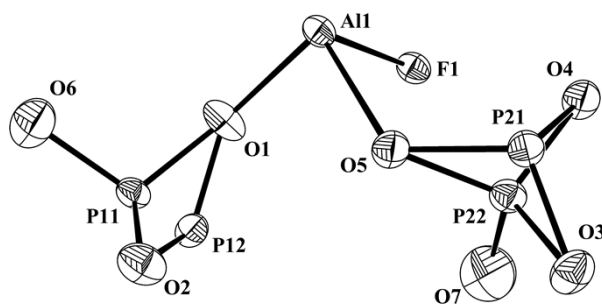

**Fig. S3** The connectivity of framework atoms in the asymmetric unit.

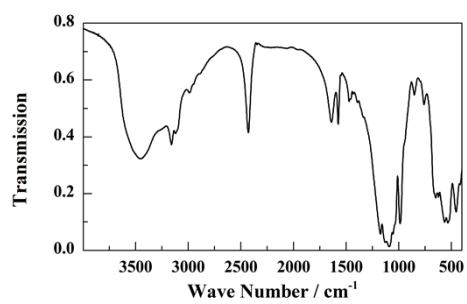

**Fig. S4** The Fourier transform infrared spectrum of DNL-2.
